# Supplementary material for: Residue-level determinants of the thermal stability of the extremophilic Ts2631 endolysin
Source: Research Square preprint supplement (doi:10.21203/rs.3.rs-7963567/v1), 2025-11-10
Supplement: Supplementary file 1 [file 031188c6f28d0079b9117e65.docx]

Residue-level determinants of thermal stability in the extremophilic Ts2631 endolysin

Karolina Ciemińska1, Anna-Karina Kaczorowska2, Lukasz Pawel Kozlowski3, Marcin Gorniak4, Olafur H. Fridjonsson5, Gudmundur O. Hreggvidsson5, Tadeusz Kaczorowski1, Magdalena Plotka1,2*

1Laboratory of Extremophiles Biology, Department of Microbiology, University of Gdansk, Gdansk, Poland

2Collection of Plasmids and Microorganisms | KPD, Department of Microbiology, Faculty of Biology, University of Gdansk, Gdansk, Poland

3Institute of Informatics, Faculty of Mathematics, Informatics and Mechanics, University of Warsaw, Warsaw, Poland

4Department of Evolutionary Genetics and Biosystematics, Faculty of Biology, University of Gdansk, Gdansk, Poland

5Matis ohf, Reykjavik, Iceland

*Correspondence: Magdalena Plotka; magdalena.plotka@ug.edu.pl

Keywords: bacteriophage, thermostable endolysin, extremophile, mutagenesis

**Table S1.** Sixty two N-acetylmuramoyl-L-alanine amidases and peptidoglycan recognition proteins (PGRPs) used for phylogenetic tree construction.

| No | NCBI accession/PDB ID/UniProtKB | Organism |
| --- | --- | --- |
| 1 | **6FHG** | *Thermus* phage 2631 |
| 2 | **MDM7323587.1** | *Thermus* sp. |
| 3 | **6SU5** | *Thermus* phage 2119 |
| 4 | **MDA1317314.1** | bacterium |
| 5 | **MBD3279583.1** | *Candidatus Pacebacteria* bacterium |
| 6 | **6SSC** | *Clostridium intestinale* |
| 7 | **phiKo** | *Thermus thermophilus* HB27 |
| 8 | **MCS7107721.1** | *Acidilobaceae* archaeon |
| 9 | **DAE43342.1** | *Caudoviricetes* sp. |
| 10 | **MCH5213438.1** | *Oscillospiraceae* bacterium |
| 11 | **WP_241078918.1** | *Natranaerofaba carboxydovora* |
| 12 | **WP_303342367.1** | *Paracoccus* sp. in a proteobacteria |
| 13 | **RMH34273.1** | *Acidobacteriota* bacterium |
| 14 | **NLO20643.1** | *Syntrophomonadaceae* bacterium |
| 15 | **MBR0519315.1** | bacterium |
| 16 | **MGE4353143.1** | *Oscillospiraceae* bacterium |
| 17 | **WP_270478853.1** | *Butyricicoccus* sp. AF18-9LB |
| 18 | **WP_084413195.1** | *Desulfovirgula thermocuniculi* |
| 19 | **WP_013822190.1** | *Desulfofundulus kuznetsovii* |
| 20 | **OPX87006.1** | *Pelotomaculum* sp. PtaB.Bin104 |
| 21 | **WP_206155540.1** | *Caldanaerobacter subterraneus* |
| 22 | **WP_013411805.1** | *Caldicellulosiruptor owensensis* |
| 23 | **1LBA** | *Escherichia* phage T7 |
| 24 | **WP_313216519.1** | *Soonwooa* sp. |
| 25 | **WP_018675537.1** | *Riemerella columbina* |
| 26 | **WP_223929162.1** | *Prevotella lacticifex* |
| 27 | **OFY23091.1** | *Bacteroidetes* bacterium GWF2 33 38 |
| 28 | **P20331.3** | *Enterobacteria* phage T3 |
| 29 | **WP_102980123.1** | *Chryseobacterium scophthalmum* |
| 30 | **MCC6371195.1** | *Bacteroidia* bacterium |
| 31 | **MBI3519188.1** | *Bacteroidetes* bacterium |
| 32 | **UCC89574.1 416-534** | *Anaerolineales* bacterium |
| 33 | **MEM2567417.1** | *Bathyarchaeia* archaeon |
| 34 | **UCC89574.1 644-764** | *Anaerolineales* bacterium |
| 35 | **WP_376794482.1** | *Thermogemmatispora* sp. |
| 36 | **WP_099150147.1** | *Flavilitoribacter nigricans* |
| 37 | **MDR7399681.1** | *Armatimonadota* bacterium |
| 38 | **MCD6283567.1** | bacterium |
| 39 | **MFY9739136.1** | *Candidatus Cybelea* sp. |
| 40 | **TMJ10783.1** | *Candidatus Segetimicrobium genomatis* |
| 41 | **MFW5828630.1** | *Planctomycetota* bacterium |
| 42 | **GDY14718.1** | *Planctomycetota* bacterium |
| 43 | **7NSX** | *Drosophila melanogaster* |
| 44 | **2F2L** | *Drosophila melanogaster* |
| 45 | **2RKQ** | *Drosophila melanogaster* |
| 46 | **2APH** | Homo sapiens |
| 47 | **7NT0** | *Drosophila melanogaster* |
| 48 | **5XZ4** | Bombus |
| 49 | **5XZ3** | *Apis mellifera* |
| 50 | **2EAX** | *Homo sapiens* |
| 51 | **1YCK** | *Homo sapiens* |
| 52 | **4Z8I** | *Branchiostoma belcheri tsingtauense* |
| 53 | **XP_053407394.1** | *Mercenaria mercenaria* |
| 54 | **XP_052231305.1** | *Dreissena polymorpha* |
| 55 | **XP_052773324.1** | *Mya arenaria* |
| 56 | **XP_017866568.1** | *Drosophila arizonae* |
| 57 | **XP_044844983.1** | *Mauremys mutica* |
| 58 | **XP_039366792.1** | *Mauremys reevesii* |
| 59 | **XP_063287732.1** | *Pelobates fuscus* |
| 60 | **XP_053329975.1** | *Spea bombifrons* |
| 61 | **XP_073454243.1** | *Aquarana catesbeiana* |
| 62 | **XP_044161290.1** | *Bufo gargarizans* |

**Table S2.** Melting temperature of Ts2631 endolysin and its conserved residues substitution variants. * lytic activity measured in previous studies by the turbidity reduction assay indicated as +++ more than 60% activity relative to Ts2631_WT; ++ between 50 - 60%; + between 30 - 40%; − less than 20% or no visible activity (1).

| **No** | **Protein variant** | **Lytic activity*** | **Tm (°C)** | **Temp. difference (°C)** |
| --- | --- | --- | --- | --- |
| 1 | Ts2631_WT | +++ | 104.73 ± 0.17 |  |
| 2 | H31A | − | 97.59 ± 0.11 | - 7.14 |
| 3 | T32A | − | 97.92 ± 0.03 | - 6.81 |
| 4 | A33G | +++ | 103.46 ± 0.14 | - 1.27 |
| 5 | D65A | + | 98.00 ± 0.07 | - 6.73 |
| 6 | K70A | − | 104.26 ± 0.06 | - 0.47 |
| 7 | I79A | ++ | > 110 |  |
| 8 | N85A | − | > 110 |  |
| 9 | G95A | +++ | > 110 |  |
| 10 | D96A | +++ | 101.07 ± 0.34 | - 3.66 |
| 11 | N133A | +++ | 102.56 ± 0.11 | - 2.17 |
| 12 | V135A | ++ | > 110 |  |
| 13 | E138A | +++ | 104.87 ± 0.03 | + 0.14 |

**Table S3.** Primers for PCR used for site-directed mutagenesis of the *ts2631* gene.

| Primer name | Oligonucleotide sequence   (5’ - 3’) | Change |
| --- | --- | --- |
| Ts2631_R2A_F | GCGCGGCAGCCATATGGCGATACTAGAACCATGG | AGG🡪 GCG |
| Ts2631_R2A_R | CCATGGTTCTAGTATCGCCATATGGCTGCCGCGC |  |
| Ts2631_P6A_F | CCATATGAGGATACTAGAAGCATGGAATAGGTGGTACAG | CCA🡪GCA |
| Ts2631_P6A_R | CTGTACCACCTATTCCATGCTTCTAGTATCCTCATATGG |  |
| Ts2631_W7A_F | CATATGAGGATACTAGAACCAGCGAATAGGTGGTACAGGCAAAA | TGG🡪 GCG |
| Ts2631_W7A_R | TTTTGCCTGTACCACCTATTCGCTGGTTCTAGTATCCTCATATG |  |
| Ts2631_R9A_F | ATATGAGGATACTAGAACCATGGAATGCGTGGTACAGGCAAAAG | AGG🡪 GCG |
| Ts2631_R9A_R | CTTTTGCCTGTACCACGCATTCCATGGTTCTAGTATCCTCATAT |  |
| Ts2631_W10A_F | CTAGAACCATGGAATAGGGCGTACAGGCAAAAGAGGGC | TGG🡪 GCG |
| Ts2631_W10A_R | GCCCTCTTTTGCCTGTACGCCCTATTCCATGGTTCTAG |  |
| Ts2631_R12A_F | CATGGAATAGGTGGTACGCGCAAAAGAGGGCCTACC | AGG🡪 GCG |
| Ts2631_R12A_R | GGTAGGCCCTCTTTTGCGCGTACCACCTATTCCATG |  |
| Ts2631_R15A_F | TGGTACAGGCAAAAGGCGGCCTACCGGGTACG | AGG 🡪 GCG |
| Ts2631_R15A_R | CGTACCCGGTAGGCCGCCTTTTGCCTGTACCA |  |
| Ts2631_R18A_F | CAAAAGAGGGCCTACGCGGTACGGCTAACGCC | CGG🡪 GCG |
| Ts2631_R18A_R | GGCGTTAGCCGTACCGCGTAGGCCCTCTTTTG |  |
| Ts2631_R20A_F | GAGGGCCTACCGGGTAGCGCTAACGCCTAT | CGG🡪 GCG |
| Ts2631_R20A_R | ATAGGCGTTAGCGCTACCCGGTAGGCCCTC |  |
| Ts2631_P23A_F | CGGGTACGGCTAACGGCTATCCATTACGTTGT | CCT🡪 GCT |
| Ts2631_P23A_R | ACAACGTAATGGATAGCCGTTAGCCGTACCCG |  |
| Ts2631_P35A_F | CACACGGCGGGGGCGGAGAACCAAA | CCG🡪 GCG |
| Ts2631_P35A_R | TTTGGTTCTCCGCCCCCGCCGTGTG |  |
| Ts2631_P40A_F | CCGGAGAACCAAACCGCCGAAGCGATAAAAC | CCC🡪 GCC |
| Ts2631_P40A_R | GTTTTATCGCTTCGGCGGTTTGGTTCTCCGG |  |
| Ts2631_R45A_F | CAAACCCCCGAAGCGATAAAAGCCTACCACGAGGA | CGC🡪 GCC |
| Ts2631_R45A_R | TCCTCGTGGTAGGCTTTTATCGCTTCGGGGGTTTG |  |
| Ts2631_R51A_F | ACGAGGAGGCCGCGGGGTGGCCCC | CGG🡪 GCG |
| Ts2631_R51A_R | GGGGCCACCCCGCGGCCTCCTCGT |  |
| Ts2631_W53A_F | GAGGCCCGGGGGGCGCCCCATATCGG | TGG🡪 GCG |
| Ts2631_W53A_R | CCGATATGGGGCGCCCCCCGGGCCTC |  |
| Ts2631_P73A_F | GGTGTACAAAACGCTCGCGAATAACGCCGTACC | CCG🡪 GCG |
| Ts2631_P73A_R | GGTACGGCGTTATTCGCGAGCGTTTTGTACACC |  |
| Ts2631_P78A_F | CCCGAATAACGCCGTAGCTATTTGCGTTAGGGA | CCT🡪 GCT |
| Ts2631_P78A_R | TCCCTAACGCAAATAGCTACGGCGTTATTCGGG |  |
| Ts2631_R82A_F | ACGCCGTACCTATTTGCGTTGCGGAGTTTAACCCTGTTTC | AGG🡪 GCG |
| Ts2631_R82A_R | GAAACAGGGTTAAACTCCGCAACGCAAATAGGTACGGCGT |  |
| Ts2631_P86A_F | GCGTTAGGGAGTTTAACGCTGTTTCCATTTGTGTG | CCT🡪 GCT |
| Ts2631_P86A_R | CACACAAATGGAAACAGCGTTAAACTCCCTAACGC |  |
| Ts2631_W102A_F | ATTTTTCAGCAGGTGTGGCGCCTGATGACGCTCCAG | TGG🡪 GCG |
| Ts2631_W102A_R | CTGGAGCGTCATCAGGCGCCACACCTGCTGAAAAAT |  |
| Ts2631_P103A_F | AGCAGGTGTGTGGGCTGATGACGCTCC | CCT🡪 GCT |
| Ts2631_P103A_R | GGAGCGTCATCAGCCCACACACCTGCT |  |
| Ts2631_P107A_F | CCTGATGACGCTGCAGGATGGCGGG | CCA🡪 GCA |
| Ts2631_P107A_R | CCCGCCATCCTGCAGCGTCATCAGG |  |
| Ts2631_W109A_F | GCCTGATGACGCTCCAGGAGCGCGGGCTCTA | TGG🡪 GCG |
| Ts2631_W109A_R | TAGAGCCCGCGCTCCTGGAGCGTCATCAGGC |  |
| Ts2631_R110A_F | CGCTCCAGGATGGGCGGCTCTATGGGAG | CGG🡪 GCG |
| Ts2631_R110A_R | CTCCCATAGAGCCGCCCATCCTGGAGCG |  |
| Ts2631_W113A_F | AGGATGGCGGGCTCTAGCGGAGTTGAAGCAGG | TGG🡪 GCG |
| Ts2631_W113A_R | CCTGCTTCAACTCCGCTAGAGCCCGCCATCCT |  |
| Ts2631_P124A_F | CCCTAGCAAAAGCGTATGCTAAGGCGCTTTTTGTA | CCT🡪 GCT |
| Ts2631_P124A_R | TACAAAAAGCGCCTTAGCATACGCTTTTGCTAGGG |  |
| Ts2631_P136A_F | CTGCACAAAAACCTTGTAGCCACAGAATGCCCTGG | CCC🡪 GCC |
| Ts2631_P136A_R | CCAGGGCATTCTGTGGCTACAAGGTTTTTGTGCAG |  |
| Ts2631_P140A_F | ACCCACAGAATGCGCTGGGCGGTTGAC | CCT🡪 GCT |
| Ts2631_140A_R | GTCAACCGCCCAGCGCATTCTGTGGGT |  |
| Ts2631_R142A_F | CAGAATGCCCTGGGGCGTTGACCTGGGAAC | CGG🡪 GCG |
| Ts2631_R142A_R | GTTCCCAGGTCAACGCCCCAGGGCATTCTG |  |
| Ts2631_W145A_F | CCTGGGCGGTTGACCGCGGAACTGATACAGAG | TGG🡪 GCG |
| Ts2631_W145A_R | CTCTGTATCAGTTCCGCGGTCAACCGCCCAGG |  |
| Ts2631_R150A_F | CTGGGAACTGATACAGGCGAAGGGGGGAGGTGG | AGG🡪 GCG |
| Ts2631_R150A_R | CCACCTCCCCCCTTCGCCTGTATCAGTTCCCAG |  |


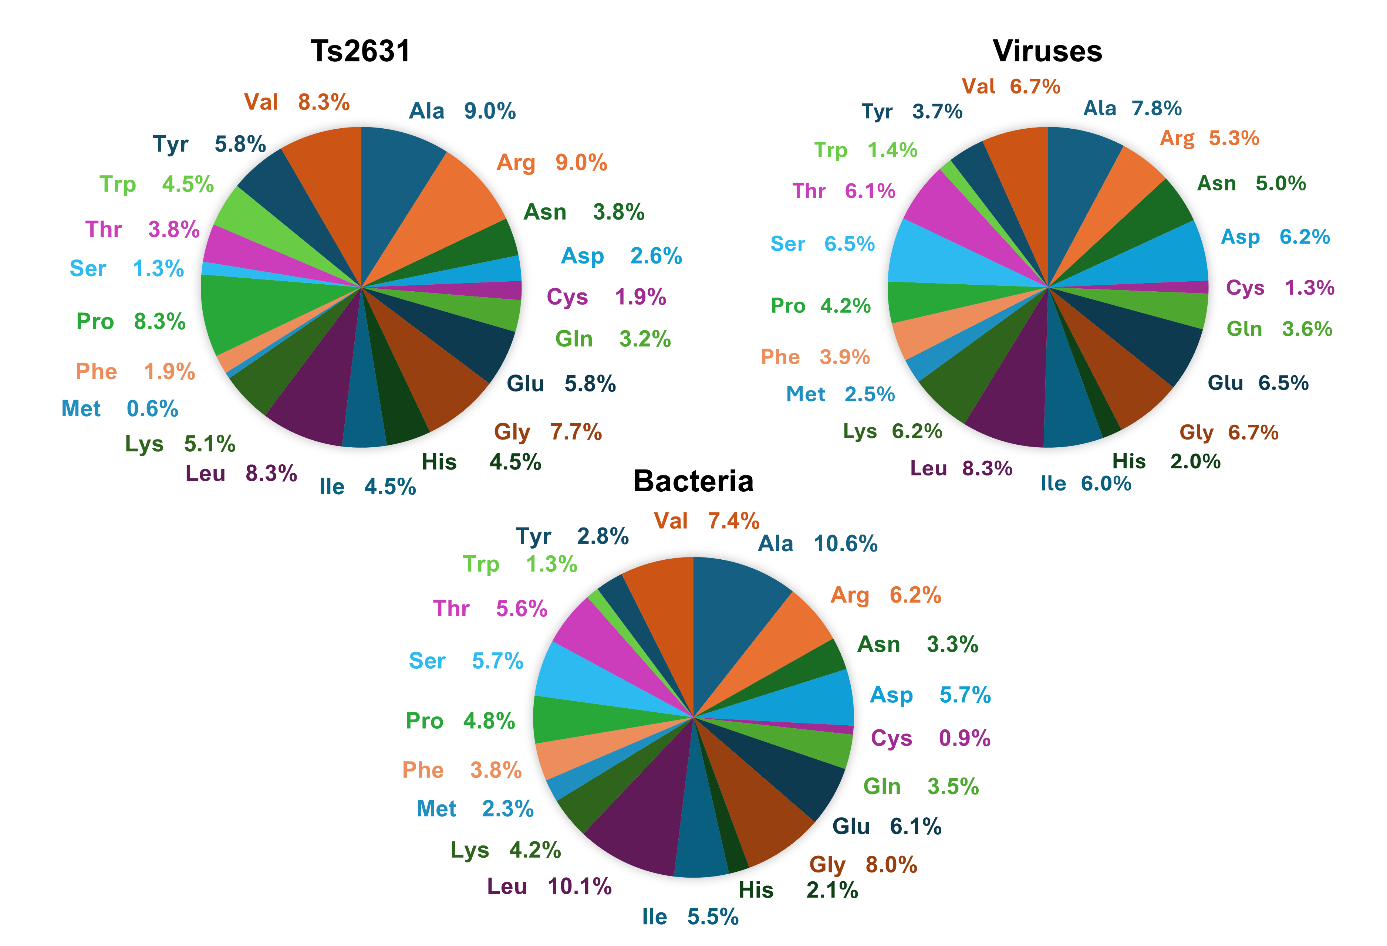


**Figure S1.** **Pie charts of amino acid distribution in Ts2631 endolysin sequence and viral and bacterial proteins.** Amino acid composition and their frequency in the Ts2631 protein sequence compared to the frequency of individual amino acids in viral (10 064 proteomes with 518 140 proteins in total), and bacterial proteomes (8 108 proteomes with 30 290 647 proteins in total) according to Kozlowski LP, 2022 (2).


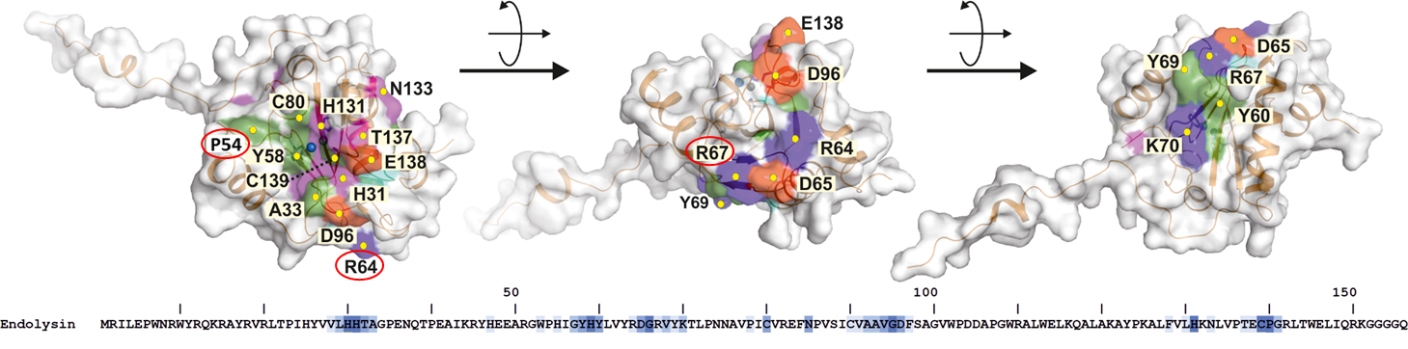


**Figure S2. Surface representation of Ts2613 endolysin (PDB 6FHG) with conserved residues highlighted.** Based on a multiple sequence alignment, conserved residues on the surface of Ts2631 endolysin were identified. These residues cluster around the active site (left picture) and on the opposite side of the molecule. Five single amino acid substitution variants (H30N, Y58F, H131N, T137K and C139S) were previously constructed to validate the catalytic site of the protein (3). Recently nineteen other variants (H31A, T32A, A33G, **P54A**, Y60A, **R64A**, D65A, **R67A**, Y69A, K70A, L72A, I79A, C80A, N85A, G95A, D96A, N133A, V135A, E138A) were designed and purified to investigate the influence of conserved residues on lytic activity of the enzyme and its ability to interact with peptidoglycan (1). Note, that in exception to proline P54 and arginines R64, R67 (marked by red circles), other tryptophans, arginines and prolines are not conserved in the primary sequence of the Ts2631 endolysin.


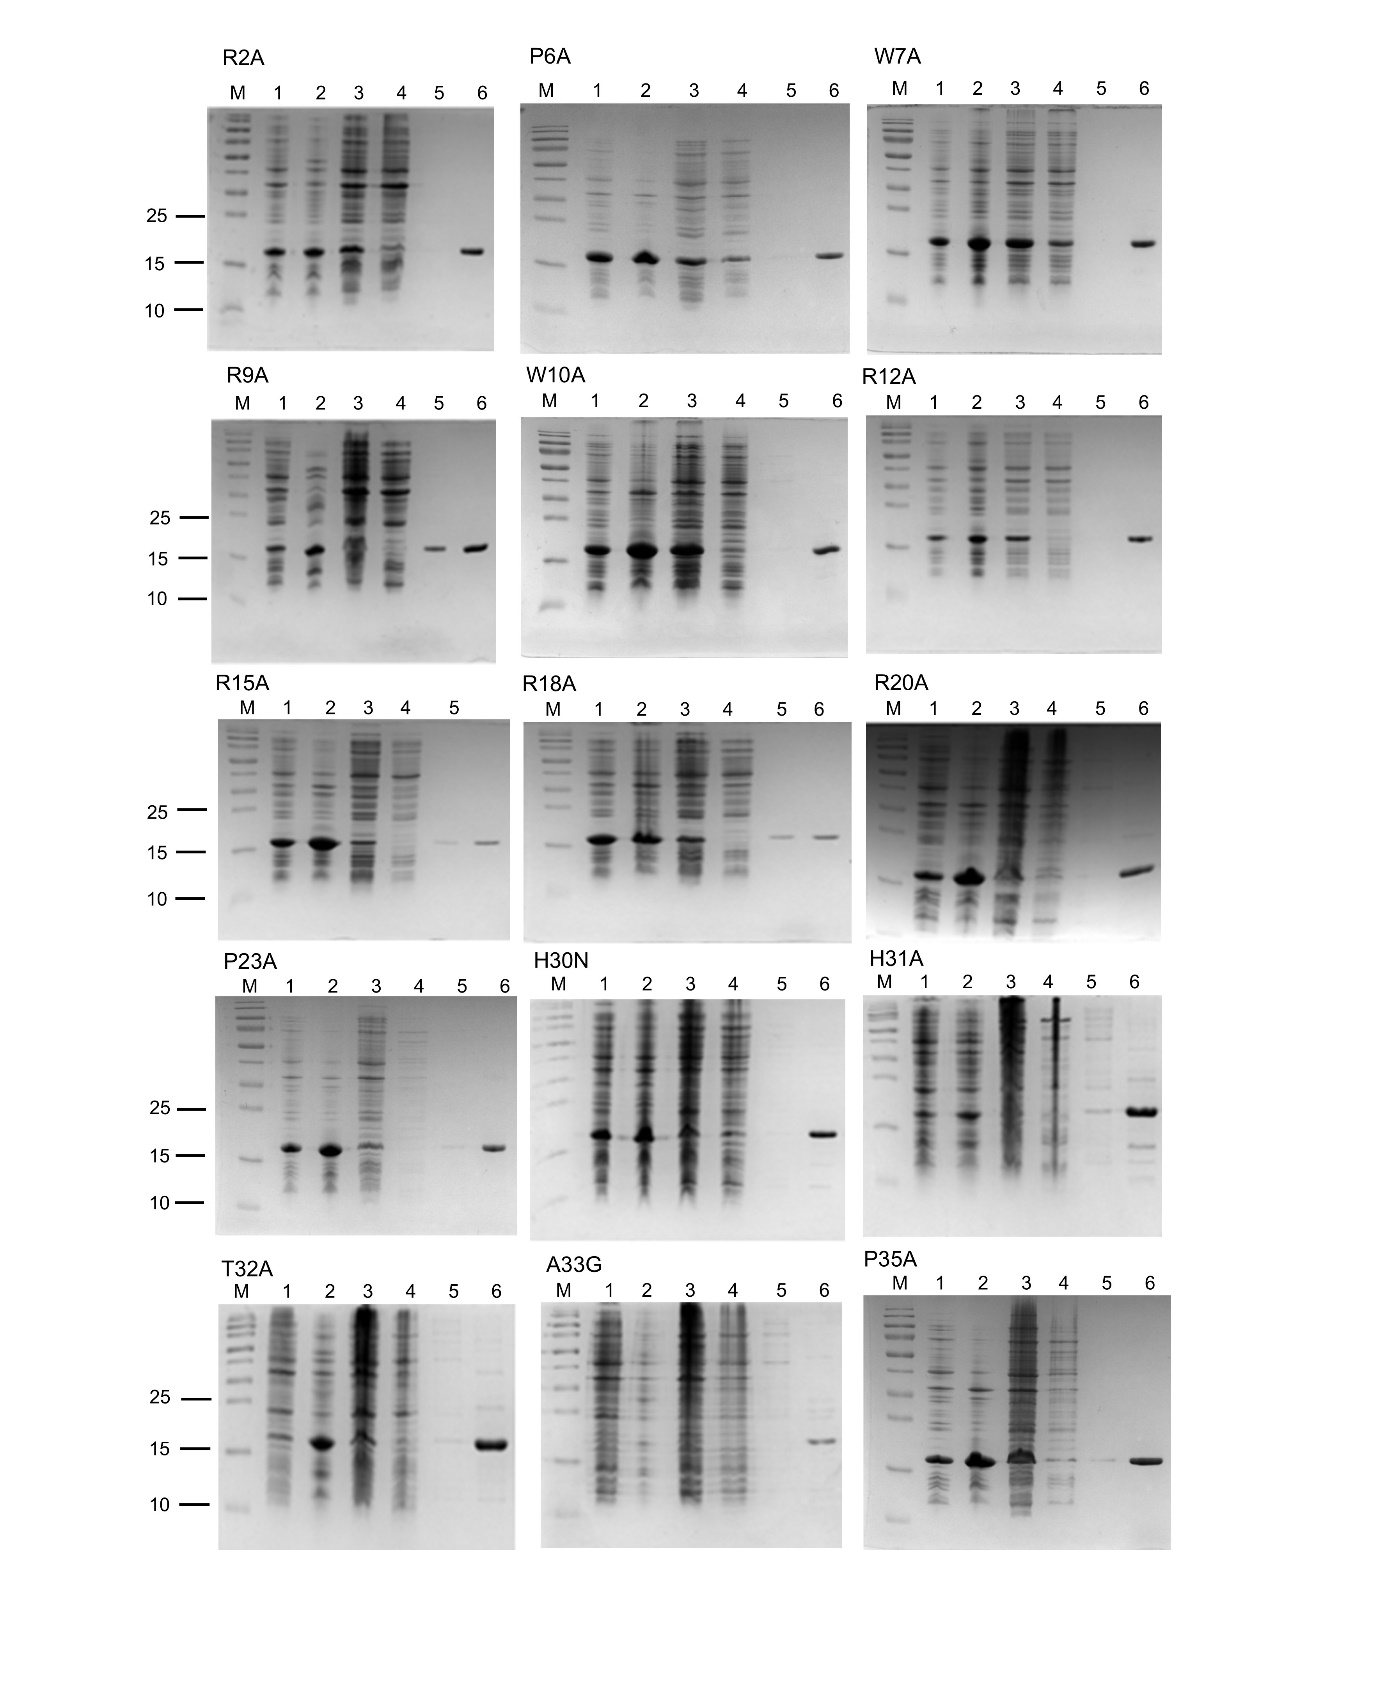


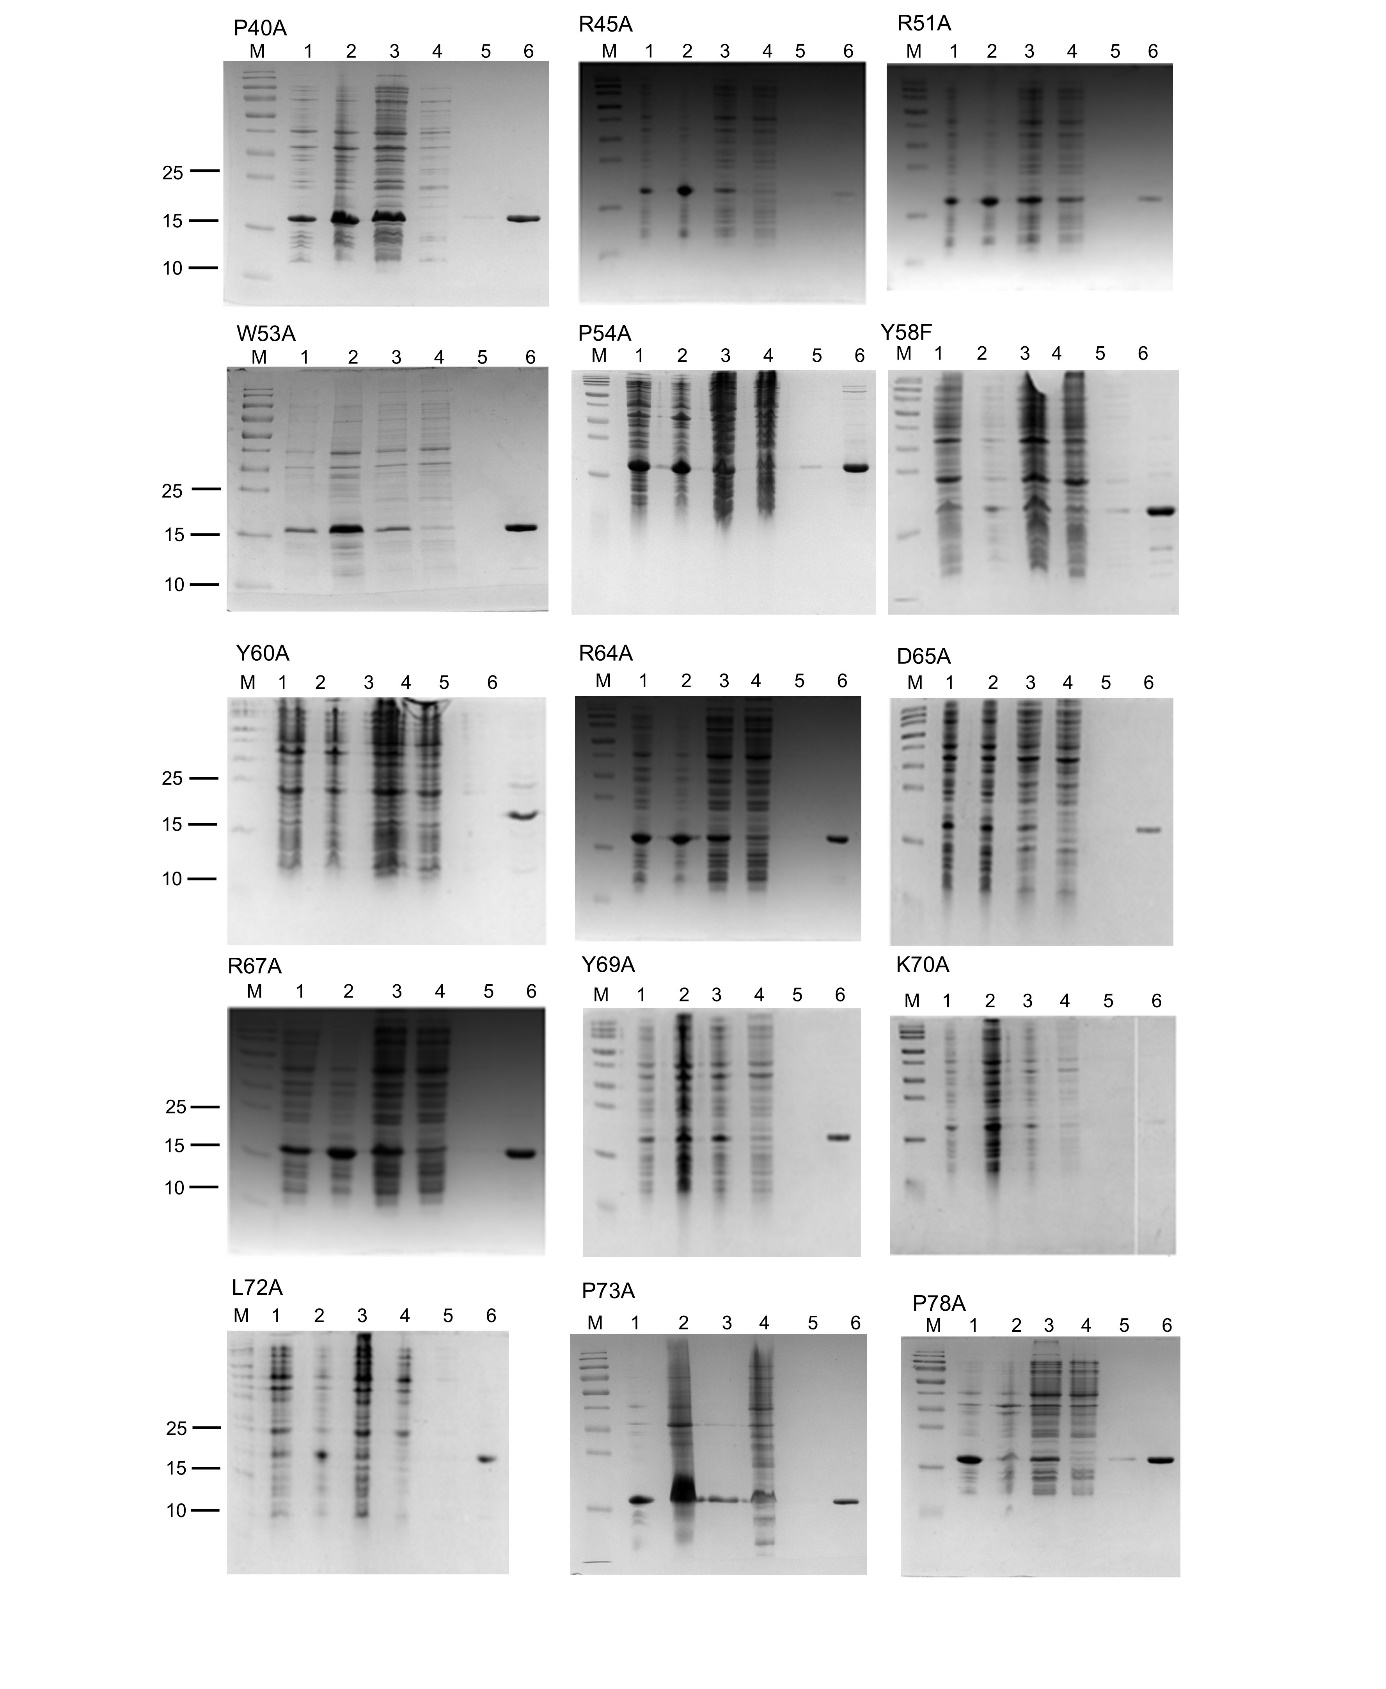


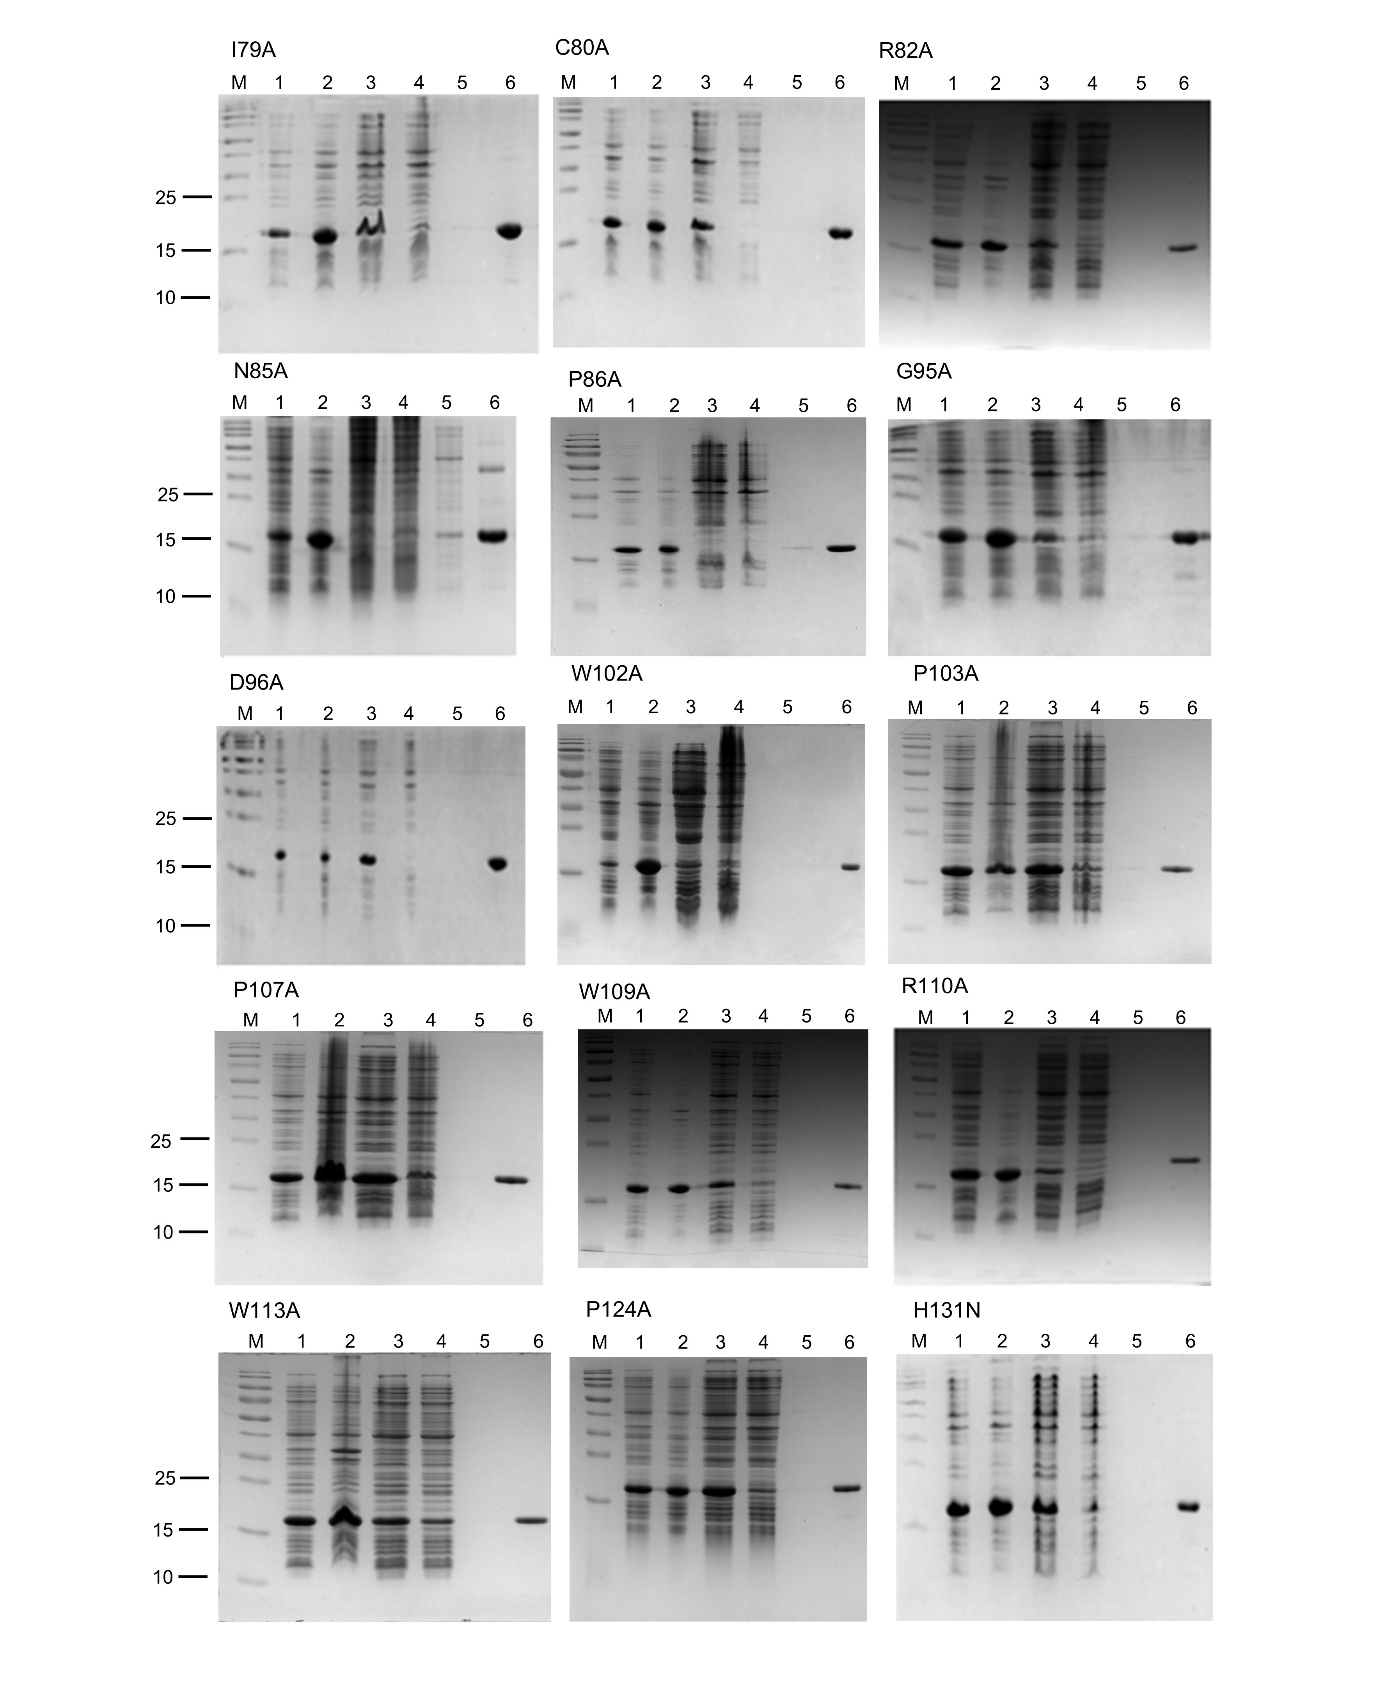


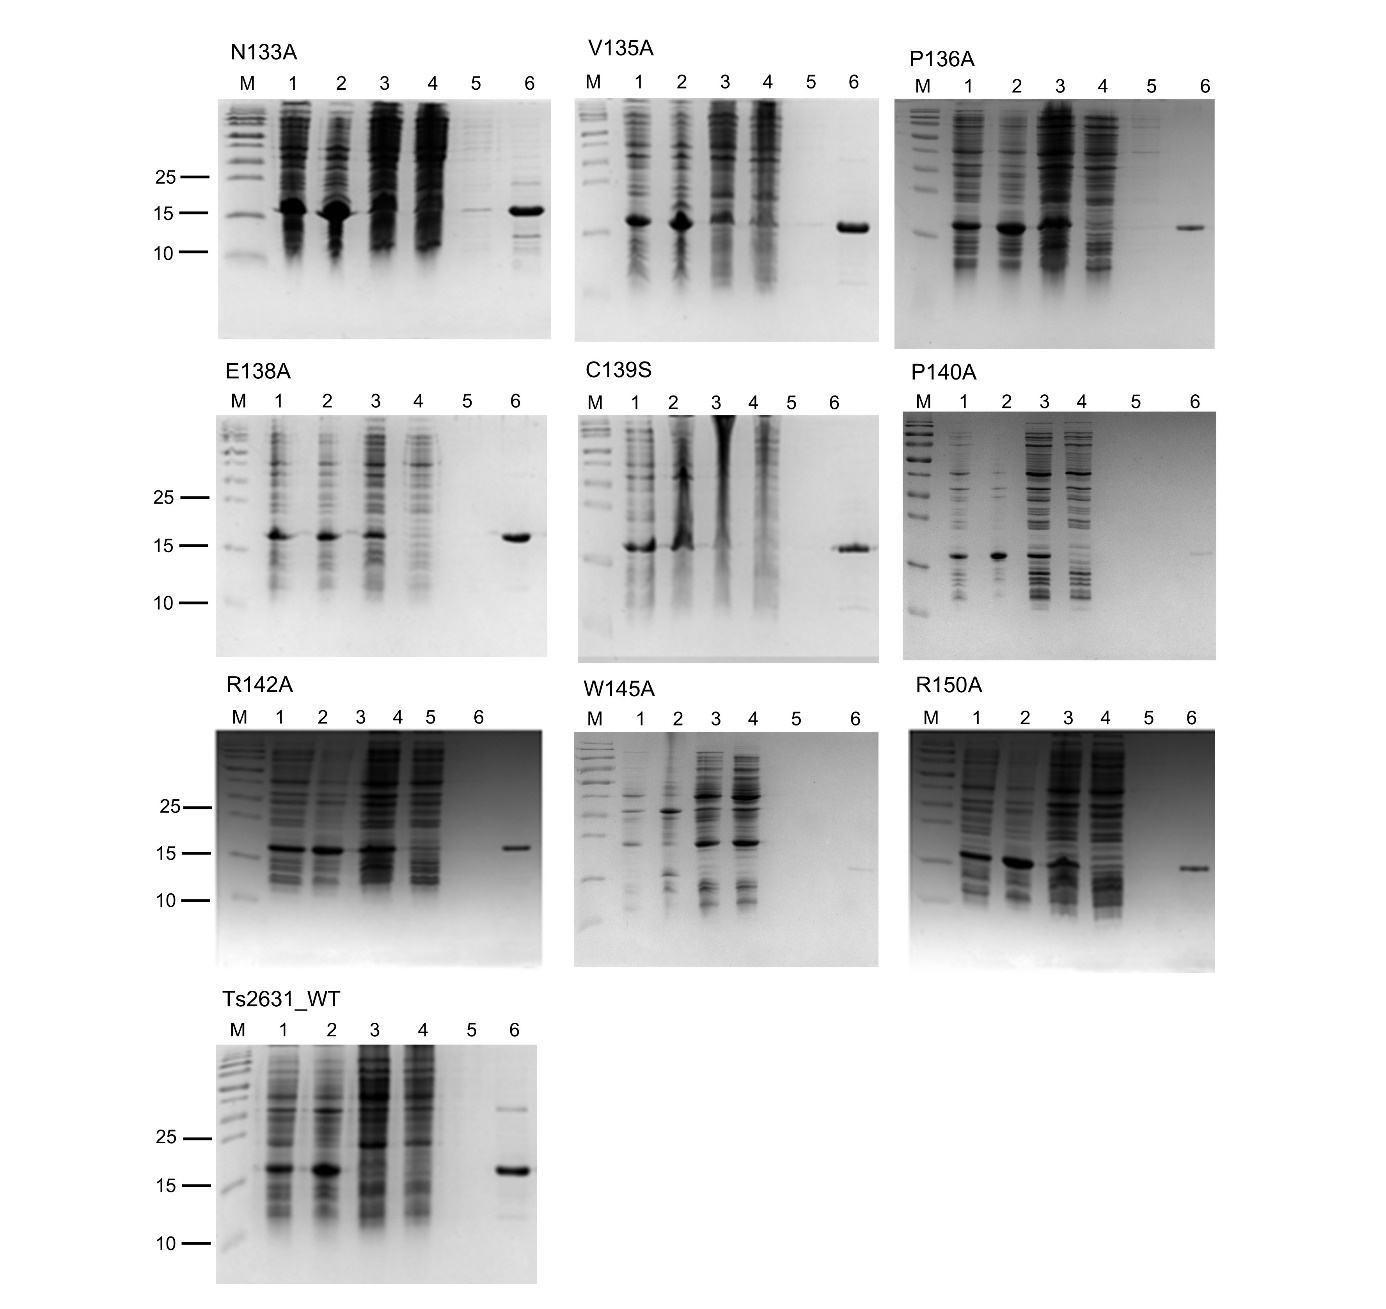


**Figure S3. Ts2631 endolysin and its variants purification.** Proteins were purified with metal ion affinity chromatography method. Evaluation of the purification was analysed with SDS-PAGE. M - PageRuler prestained protein ladder, 10 to 180 kDa (Thermo Fisher Scientific), 1 – lysate, 2 – pellet, 3 – supernatant, 4 – filtrate of proteins not bound to the resin, 5 – rising, 6 – purified protein.


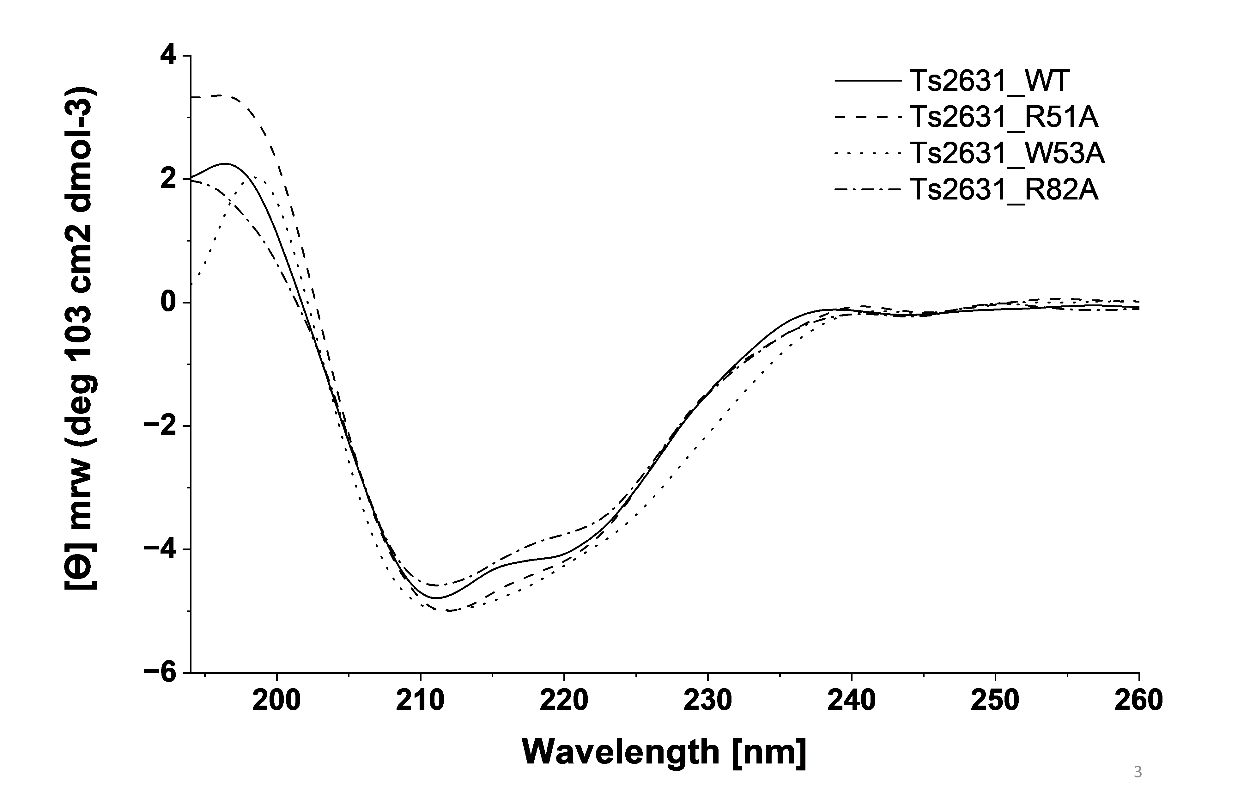


**Figure S4. Far-UV circular dichroism spectra and Ts2631 endolysin and its variants: R20A, R51A, W53A, R82A**. Proteins were dialysed against buffer: 10 mM potassium phosphate buffer, pH 8.0, 150 mM ammonium sulphate and 10% glycerol. Protein concentration was adjusted to 7.41 µM and spectra were measured at room temperature. The spectra overlapped what can suggest that the substitution in given variant did not influence the structure.


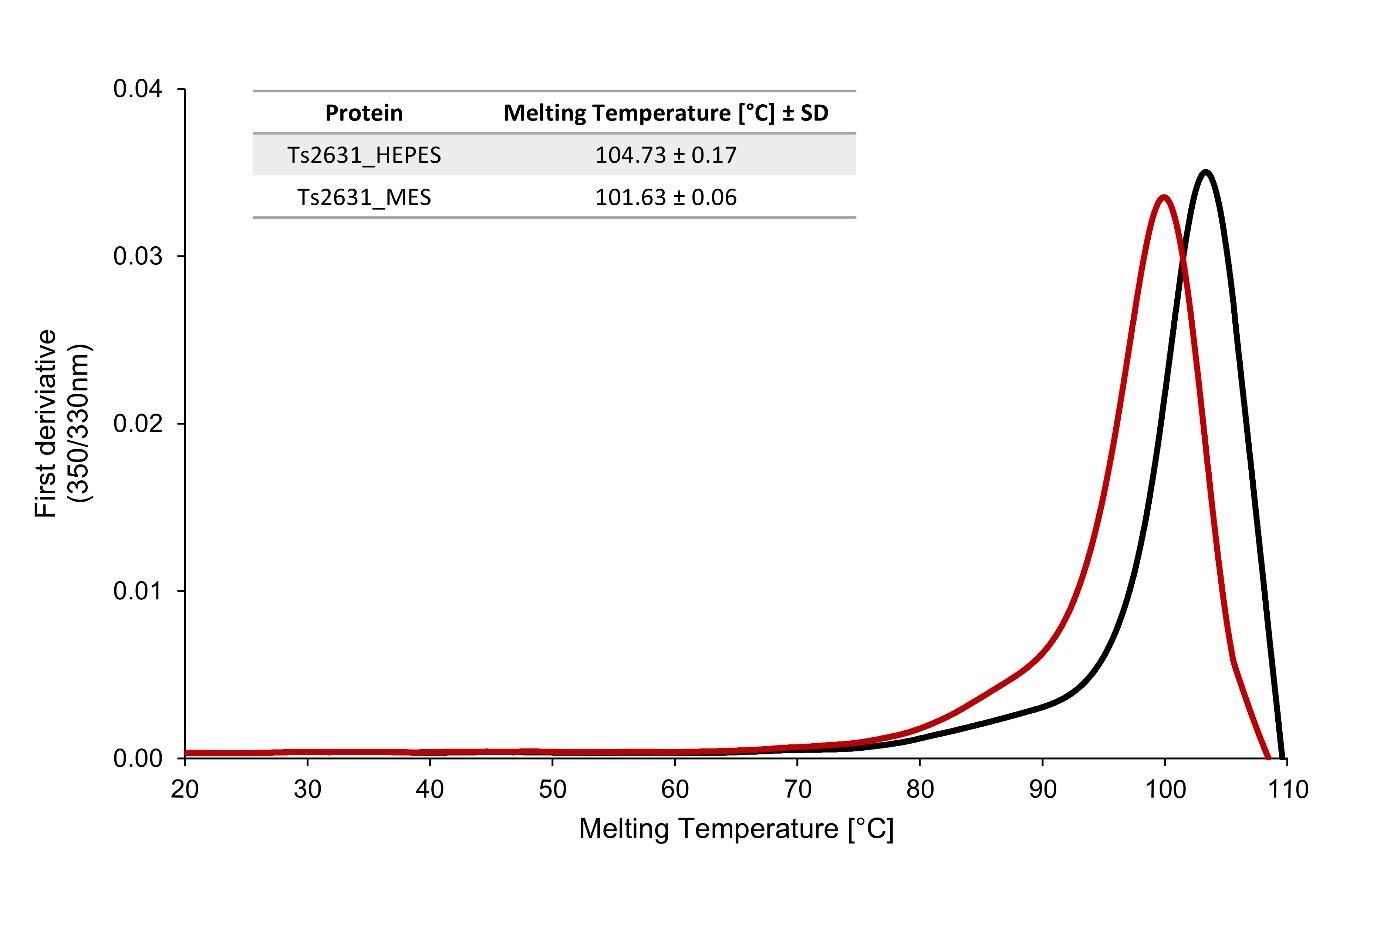


**Figure S5.** **The melting temperature of Ts2631 endolysin measured by nanoDSF.** Ts2631 endolysin was firstly dialysed against two different buffers: A - 20 mM HEPES pH 7.4, 25 mM NaCl and 10% glycerol and B - 20 mM MES pH 6.0, 25 mM NaCl, 10% glycerol. Protein were analysed at temperature range from 20°C to 110°C. The experiment was repeated four times, black colour indicate Ts2631 in buffer A and red colour in buffer B.

1. Plotka M, Sancho-Vaello E, Dorawa S, Kaczorowska AK, Kozlowski LP, Kaczorowski T, Zeth K.2019. Structure and function of the Ts2631 endolysin of Thermus scotoductus phage vB_Tsc2631 with unique N-terminal extension used for peptidoglycan binding. Sci Rep 9:1261.

2. Kozlowski LP.2022. Proteome-pI 2.0: proteome isoelectric point database update. Nucleic Acids Res 50:D1535-D1540.

3. Plotka M, Kaczorowska AK, Morzywolek A, Makowska J, Kozlowski LP, Thorisdottir A, Skírnisdottir S, Hjörleifsdottir S, Fridjonsson OH, Hreggvidsson GO, Kristjansson JK, Dabrowski S, Bujnicki JM, Kaczorowski T.2015. Biochemical Characterization and Validation of a Catalytic Site of a Highly Thermostable Ts2631 Endolysin from the *Thermus scotoductus* Phage vB_Tsc2631. PLoS One 10:e0137374.
